# 1 **Utilisation of laboratory test results for patient management by** 2 **clinicians at two large referral hospitals in Zambia**

3 **Sabe Mwape<sup>1,2</sup>, Victor Daka<sup>4\*</sup>, Scott K. Matafwali<sup>3</sup>, Kapambwe Mwape<sup>3</sup>, Jay Sikalima<sup>6</sup> Pipina A. Vlahakis<sup>3</sup>,**  
4 **Memory C. Kaloleksha<sup>3</sup>, Namaunga K. Chisompola<sup>3</sup> Victor Chalwe<sup>1,5</sup>.**

## 5 6 **Affiliation**

7 <sup>1</sup>University of Lusaka, P.O Box 37413, Lusaka, Zambia.

8 <sup>2</sup>Catholic Relief Services, P.O Box 38086, Lusaka, Zambia.

9 <sup>3</sup>Copperbelt University, School of Medicine, Basic Science Department, P.O Box 71191 Ndola, Zambia.

10 <sup>4</sup>Copperbelt University, School of Medicine, Department of Clinical Sciences, Public Health Unit, P.O  
11 Box 71191 Ndola, Zambia.

12 <sup>5</sup>National Health Research Authority, P.O Box 30075, Lusaka, Zambia.

13 <sup>6</sup>Tropical Diseases Research Centre, P.O Box 71769, Ndola, Zambia.

14  
15 Email address:

16 [sabe316@gmail.com](mailto:sabe316@gmail.com) (S. Mwape), [dakavictorm@gmail.com](mailto:dakavictorm@gmail.com) (V. Daka), [esco1789@gmail.com](mailto:esco1789@gmail.com) (S. K Matafwali), [kapsykm@gmail.com](mailto:kapsykm@gmail.com) (K. Mwape),  
17 [jsikalima@gmail.com](mailto:jsikalima@gmail.com) (J. Sikalima), [pipina.vlahakis@gmail.com](mailto:pipina.vlahakis@gmail.com) (P. Vlahakis), [memkay59@ymail.com](mailto:memkay59@ymail.com) (M. C. Kaloleksha), [unga\\_k@yahoo.co.uk](mailto:unga_k@yahoo.co.uk) , (N. K  
18 Chisompola), [victorchalwe@gmail.com](mailto:victorchalwe@gmail.com) (V. Chalwe)

19 \* Corresponding author: Victor Daka, [dakavictorm@gmail.com](mailto:dakavictorm@gmail.com), Copperbelt University, School of Medicine,  
20 Department of Clinical Sciences, Public Health Unit, P.O Box 71191 Ndola, Zambia.

## 21 22 **Abstract**

### 23 **Background**

24 Medical laboratory diagnosis is a critical component of patient management in the healthcare  
25 setup. Despite the availability of laboratory tests, clinicians may not utilise them to make clinical  
26 decisions. We investigated utilisation of laboratory tests for patient management among clinicians  
27 at Ndola Teaching Hospital (NTH) and Arthur Davison Childrens Hospital (ADCH), two large  
28 referral hospitals in the Copperbelt Province, Ndola, Zambia.

### 29 **Method**

30 We conducted a descriptive cross-sectional study among clinicians. The study deployed self-  
31 administered questionnaires to evaluate clinician utilisation, querying and confidence in  
32 laboratory results. Additional data on demographics and possible laboratory improvements were  
33 also obtained. Data were entered in Microsoft excel and exported to SPSS version 16 for  
34 statistical analysis.

### 35 **Results**

36 Of the 80 clinicians interviewed, 96.2% (77) reported using laboratory tests and their results in  
37 patient management. 77.5% (62) of the clinicians indicated they always used laboratory results to  
38 influence their patient management decisions. Of the selected laboratory tests, clinicians were  
39 more confident in using haemoglobin test results (91.2%). There was no statistically significant  
40 association between the clinicians gender or qualification and use of test results in patient  
41 management.

#### 42 **Conclusion**

43 Our findings show that despite the majority querying laboratory results, most of the clinicians  
44 use laboratory results for patient management. There is need for interactions between the  
45 laboratory and clinical area to assure clinician confidence in laboratory results.

46 **Key words:** utilisation, clinicians, laboratory tests, Ndola Teaching Hospital, Arthur Davison  
47 Childrens Hospital

48

## 49 **1.0 Introduction**

50 Clinicians are tasked with making informed decisions regarding patient care based on available  
51 clinical information. This can be derived from patient history and physical examination [1].  
52 Although data elicited from the history and physical examination may be sufficient for making a  
53 diagnosis or for guiding therapy, more information is often required. This information can be  
54 obtained from diagnostic tests such as medical laboratory tests (MLTs) [2,3].

55 Medical laboratory tests greatly influence health care decisions and are among the least  
56 expensive components of the health care pathway [4]. These tests provide objective information  
57 about a person's health which can be used for many purposes [4,5]. One such purpose is to  
58 decrease diagnostic uncertainty in a patient presenting with non-specific signs and symptoms as  
59 well as to monitor treatment response in a patient with a prior diagnosis after commencing  
60 treatment [5]. MLTs may also be requested for screening or case-finding, and in some cases, at a  
61 patient's request [5].

62 Accessibility to MLTs varies with some tests only available as point-of-care while others may  
63 only be available at a reference laboratory [6,7]. This greatly impacts patient management.  
64 Clinical studies have demonstrated instances in which diagnostic tests were used for patient care  
65 and how these tests influenced patient care [8,9]. The studies further stressed the benefits of  
66 using medical laboratory tests in health services and emphasized the critical role the laboratory  
67 results play in effective patient management [10]. Additionally, MLTs have demonstrated to  
68 reduce treatment costs due to empiric therapy as well as prolonged hospital stays [8].

69  
70 Despite the highlighted benefits, clinicians often do not use laboratory tests in patient  
71 management [11]. A trend of low utilization of laboratory results in patient management has  
72 been observed as one of the major factors negatively impacting outcomes for most patients  
73 accessing health care services in resource-constrained countries of Sub-Saharan Africa [11,12].  
74 Coupled with the challenges of high disease burden, scarce funding, inadequate health personnel,  
75 poor health linkages, and inadequate infrastructure, the practice has the potential to negatively  
76 affect the provision of quality health services [13]. We, therefore, undertook a cross-sectional  
77 descriptive study of the utilisation of laboratory services by clinicians at NTH and ADCH, two  
78 large tertiary referral hospitals in Ndola, Zambia.

79

## 80 **2.0 Methods**

### 81 **2.1 Study Site**

82 The study was conducted at NTH and ADCH in Ndola, Zambia. NTH is a provincial referral  
83 hospital for the northern region of Zambia which includes Copperbelt, Luapula and North-  
84 Western Provinces of Zambia [14]. ADCH, the only paediatric hospital in Zambia, is located  
85 approximately 2km from the city center of Ndola with a bed capacity of 250 [15]. The two  
86 hospitals are approximately 2km apart and with inherent similarities in staffing as clinicians may  
87 rotate between the two hospitals.

### 88 **2.2 Target population**

89 The target population was clinicians working at NTH and ADCH. Primary data were collected  
90 from 80 practicing clinicians attending to patients at the two hospitals.

91

### 92 **2.3 Sampling**

93 All available clinicians working at the two hospitals during the study period and willing to  
94 participate in the study were enrolled.

95

### 96 **2.4 Data collection**

97 Data were collected using a self-administered questionnaire. Trained research assistants were  
98 available for the clinician to consult where they needed clarifications. The questionnaire was  
99 divided into questions on demographics, utilisation of laboratory results, querying of results,  
100 confidence in laboratory tests and clinician's perception on laboratory needs and improvements.  
101 Utilisation and querying of results were assessed through a three point scale—yes, sometimes and  
102 no.

103

### 104 **2.5 Data analysis**

105 Data were entered in excel and cleaned for consistency and range checks and then exported to  
106 SPSS version 16 for statistical analysis. We conducted an internal reliability test for our  
107 questionnaire using the Cronbach's alpha according to methods described by Taber [16] and  
108 obtained an alpha value of 0.631 indicating acceptable reliability. The chi-square test was used to  
109 determine factors associated with the use of laboratory tests and a p-value less than 0.05 ( $p < 0.05$ )  
110 was considered significant.

### 111 **3.0 Ethical considerations**

112 Ethical clearance was granted by ERES Converge Institutional Review Board (IRB) and  
113 authority to conduct the study was obtained from the National Health Research Authority  
114 (NHRA). Written permission to carry out the study was sought from the Provincial Medical  
115 Office for Copperbelt Province. All respondents that accepted to be part of the study were  
116 provided with informed consent and were told the study objectives, procedure, risks, and  
117 benefits, and participant's rights. No identifiers were used to ensure confidentiality and  
118 anonymity of respondents. Access to all study materials including questionnaires was restricted  
119 to the investigator and assistants.

120

### 121 **4.0 Results**

122 There were more male respondents (n=51, 64%) than females. Two-thirds of the respondents  
123 were aged between 20 and 39 years of age had been one to three years in service. Majority of the  
124 respondents were medical doctors (86.3%) and were trained in Zambia (Table 1).

125

126 **Table 1. Demographic characteristics of respondents**

| Variable            | Characteristic (N=80) | n (%)    |
|---------------------|-----------------------|----------|
| Gender              | Male                  | 51(64.0) |
|                     | Female                | 29(36.0) |
| Age Category        | 20-30 years           | 54(67.5) |
|                     | 31-40 years           | 22(27.5) |
|                     | > 40 years            | 4(5.0)   |
| Profession          | Medical doctor        | 69(86.3) |
|                     | Clinical officer      | 10(12.5) |
|                     | Medical licentiate    | 1(1.2)   |
| Country of Training | Zambia                | 70(87.5) |
|                     | Other                 | 10(12.5) |
| Years of service    | 1-3 years             | 65(81.2) |
|                     | > 3 years             | 15(18.8) |

127 Table 2 summarises the use, querying and clinician request for repeat results. The majority of the  
 128 respondents reported using laboratory results all the time (62, 77.5%). Almost half of the  
 129 respondents reported querying laboratory results all the time (39, 48.8%). There were more  
 130 clinicians who reported never requesting to repeat a tuberculosis (TB) test (50, 62.5%) and  
 131 microscopy culture and sensitivity result (47, 58.8%). There were more requests for a repeat  
 132 malaria result (50, 62.5%)

133

134 **Table 2. Use, querying of results and frequency of repeating tests**

| <b>Variable</b>                                      | <b>All the time n(%)</b> | <b>Some of the time n(%)</b> | <b>Never n(%)</b> |
|------------------------------------------------------|--------------------------|------------------------------|-------------------|
| Use of requested laboratory results                  | 62 (77.5)                | 15(18.7)                     | 3(3.8)            |
| Querying of laboratory test results                  | 39(48.8)                 | 34(42.5)                     | 7(8.8)            |
| Requested repeat of test/ Tests requested for repeat |                          |                              |                   |
| AST/ALT                                              | 11(13.8)                 | 33(41.2)                     | 36(45.0)          |
| CD4                                                  | 16(20)                   | 46(57.5)                     | 18(22.5)          |
| Hb                                                   | 35(43.8)                 | 38(47.5)                     | 7(8.8)            |
| Malaria                                              | 7(8.8)                   | 50(62.5)                     | 23(28.8)          |
| TB                                                   | 1(1.2)                   | 29(36.2)                     | 50(62.5)          |
| Microscopy, Culture and Sensitivity                  | 3(3.8)                   | 30(37.5)                     | 47(58.8)          |

135

136 Table 3 shows the confidence of clinicians in laboratory results. Respondents reported the  
 137 highest confidence in haemoglobin (Hb) results (73, 91.2%) and CD4 results (72, 90%) while  
 138 slightly over one-third of the respondents reported low confidence in malaria results (31, 38.8%).

139 **Table 3. Confidence in laboratory results by test performed**

| <b>Variables</b> | <b>Yes</b> |            | <b>No</b> |            |
|------------------|------------|------------|-----------|------------|
|                  | <b>n</b>   | <b>(%)</b> | <b>n</b>  | <b>(%)</b> |
| AST/ALT          | 69         | 86.2       | 11        | 13.8       |
| CD4              | 72         | 90         | 8         | 10         |
| Hb               | 73         | 91.2       | 7         | 8.8        |
| Malaria          | 31         | 38.8       | 49        | 60         |



146 Table 5 shows that most of the clinicians reported some interaction with laboratory staff either  
147 daily (34, 42.5%) or some of the times (38, 47.5%) with half of the respondents reporting having  
148 interacted with laboratory personnel as working colleagues (41, 51.2%).

149

150 Table 5. Frequency and type of interaction

| Variable                 | n(%)     | 151 |
|--------------------------|----------|-----|
| Frequency of interaction |          | 152 |
| On a daily basis         | 34(42.5) | 153 |
| Some of the times        | 38(47.5) | 154 |
| Very limited             | 2(2.5)   | 155 |
| Never                    | 6(7.5)   | 156 |
| Main type of interaction |          | 157 |
| During clinical meetings | 19(23.8) | 158 |
| As working colleagues    | 41(51.2) |     |
| As friends               | 3(3.8)   |     |
| When making queries      | 17(21.2) |     |
|                          |          | 162 |

163

164

165 More of the clinicians felt there was need to improve test profiles including specialized testing  
166 (33, 41.25%). The majority of the respondents (61, 76.25%) felt the laboratory was understaffed  
167 and needed to recruit more staff to meet the testing demands. Close to half (36, 45.0%) of the  
168 clinicians reported that test results took long and there was need to reduce the turnaround time  
169 (TAT).

170

171 **Table 6. Clinicians' perceptions on the required laboratory improvements**

| Variable                                                   | n (%)     |
|------------------------------------------------------------|-----------|
| Infrastructural Improvements                               |           |
| Renovation of main laboratory                              | 21(26.25) |
| Increase in the size of the laboraory                      | 18(22.5)  |
| Need for specialised testing and increase in test profiles | 33(41.25) |



Introduce laboratory information system 8(10.0)

Laboratory staff capacity improvements

---

Increase number of laboratory staff 61(76.25)

Need for laboratory staff to have capacity to interpret results 4(5.0)

Need for knowledge by laboratory staff on restricted access 7(8.75)

Laboratory staff to interact more with clinicians 8(10.0)

Other improvements

---

Improve turnaround time 36(45.0)

Improve communication of test results 11(13.75)

Establish system for communicating urgent results 10(12.5)

Improve on reagent supply 15(18.75)

Provide reference values for laboratory tests 8(10.0)

---

172

173

174 **Association of demographic variables and utilization of laboratory tests**

175 There was no association between utilization of laboratory tests and gender ( $p=0.791$ ) and years  
176 of practice ( $p=0.308$ ).

177

178

179

## 180 **5.0 Discussion**

181 Our findings demonstrated that all of the clinicians ordered a laboratory test at one time during  
182 their interaction with patients, although not all the ordered tests were used for decision making in  
183 patient management. Our findings also show that female clinicians used laboratory test results  
184 more often than male clinicians in patient management. The reasons for this occurrence remain  
185 speculative given that the analysis for a likely association between clinicians' gender and use of  
186 lab results in patient management showed that the two were not significantly related. However, it  
187 can be argued that like most studies with smaller sample sizes, increasing the sample size and  
188 frame would yield slightly different results; in this case a significant association between the two  
189 variables [17].

190  
191 The study findings also showed that three quarters of the clinicians always used laboratory  
192 results of requested tests to influence their patient management decisions. These findings are  
193 higher than the those reported from Malawi in 2009 where 64% of clinicians were using  
194 laboratory results in patient management decisions [10]. However similar findings were reported  
195 in 2015 where 70% of clinicians in Malawi always used test results in patient management [11].  
196 These differences could be due to differences in study populations and power in the two studies.

197  
198 In our study we demonstrated that about half of clinicians often questioned laboratory results,  
199 this is much lower than the reported in a study by Moyo and others in Malawi who reported 70%  
200 of the clinicians questioned results [11]. The querying of results by clinicians often leads to  
201 requests for repeat of tests. Clinicians often argue that the clinical presentation of patients may  
202 not be consistent with the laboratory results [18]. A study in Ghana reported a high reliance on  
203 clinical symptoms in diagnosing malaria [19] . In this study, results for haemoglobin were the  
204 most repeated followed by CD4 count and malaria tests. Analogous results were found in a study  
205 by Bates and Adu [20], in which following a survey of 205 laboratories in Ghana located in  
206 regional and district government hospitals, Hb and malaria had the least accurate results  
207 prompting clinicians to repeat the tests. The main reason for requesting repeat tests in our study  
208 was to confirm a diagnosis, unlike a study in Ghana where the doubts regarding the accuracy of  
209 results was the main reason for repeating the test [8]. The findings in this study could be  
210 attributed to delays in receiving results (long TAT) as the most likely reason as almost half

211 requested an improved TAT. Additionally, clinicians may also be more likely to believe  
212 automated methods rather than manual methods [21]. Therefore, there is a need to adopt  
213 strategies that reduce TATs to address the trend.

214  
215 The findings showed that those who qualify with diplomas and are clinical officers and medical  
216 licentiates tend to use lab results more than the degree holders who are medical doctors in patient  
217 management. This could be due to the medical doctors having more confidence and relying on  
218 clinical experience than the others [22]. The study also found that clinicians who interact with  
219 laboratory staff tend to use laboratory results more than those who never. Clinicians' interaction  
220 with laboratory staff was significantly associated with the use of laboratory results. This can be  
221 due to constant interaction between clinicians and laboratory staff creating an opportunity for  
222 improvements in service delivery [11].

223  
224 In this study, clinicians suggested increasing the staffing in the hospital laboratory, an increase in  
225 test profile and platforms, the establishment of a system to communicate urgent results and  
226 ensuring an adequate supply of laboratory reagents and consumables as areas needing support for  
227 the improvement of laboratory services. Other areas included renovating the laboratories,  
228 increasing the size of the laboratory, restricting access to the laboratory and the need for more  
229 interaction between laboratory staff and clinicians. These suggestions are similar to those  
230 reported by clinicians in a study done by Kundai and others and Petti and others [11,23]. The  
231 shortage of both personnel and supplies in laboratories contributes to a lengthy turnaround time  
232 as reported in a study by Lia and others [24]. Thus, the decision to order laboratory tests is often  
233 a choice between accuracy and expediency. This can lead to diagnoses often being made using  
234 less reliable and less valid signs and symptoms.

235  
236 **6.0 Conclusion**  
237 Our study demonstrated that laboratory test results are used by clinicians in patient management  
238 at NTH and ADCH. We also found that a high number of clinicians query results and have little  
239 confidence in results for some tests such as malaria. Our findings present results from regional  
240 tertiary hospitals. We recommend further studies to understand the impact of underutilizing  
241 laboratory results in a clinical setting in other health facilities in Zambia.

242

## 243 **7.0 Limitations**

244 Due to the self-administered nature of our study, we cannot rule out possible responder bias.  
245 Utilisation of laboratory results by individual clinicians could also not be verified as  
246 investigation of clinical records were not in the scope of this study. Our study found no  
247 association between some selected demographic factors and utilisation of laboratory results. This  
248 could have been affected by the limited sample size. Further, our study was limited by the short  
249 sampling period that it was thereby not including clinicians or key informants who were not  
250 available during the period of study. This could have missed out individuals that could have  
251 provided valuable information possibly omitted by the sampled participants.

## 252 **8.0 Acknowledgments**

253 We acknowledge the staff and management at NTH and ADCH for facilitating this study.

## 254 **9.0 Competing interests**

255 The authors declare that they have no financial or personal relationship(s) that may have  
256 inappropriately influenced them in writing this article.

## 257 **10.0 Author contributions**

258 Conception, design and data collection was done by SM, JS, VC and VD. Data analysis,  
259 interpretation and manuscript writing was conducted by SM, SKM, MK, PAV, NKC, VD and  
260 KM. Supervision of the study was done by VC. All authors reviewed and approved the final  
261 version of the manuscript.

262

263

264 **11.0 References**

- 265 1. Papadakis M, McPhee S, Rabow M. Current Medical Diagnosis and Treatment 2020 |  
266 AccessMedicine | McGraw-Hill Medical [Internet]. 2020 [cited 2020 Jun 11]. Available  
267 from: <https://accessmedicine.mhmedical.com/book.aspx?bookID=2683>
- 268 2. Hajjaj FM, Salek MS, Basra MKA, Finlay AY. Non-clinical influences on clinical  
269 decision-making: A major challenge to evidence-based practice. Vol. 103, Journal of the  
270 Royal Society of Medicine. Royal Society of Medicine Press; 2010. p. 178–87.
- 271 3. Wians FH. Clinical Laboratory Tests: Which, Why, and What Do The Results Mean? Lab  
272 Med [Internet]. 2009 Feb 1 [cited 2020 Aug 22];40(2):105–13. Available from:  
273 <https://academic.oup.com/labmed/article-lookup/doi/10.1309/LM4O4L0HHUTWWUDD>
- 274 4. Ngo A, Gandhi P, Miller WG. Frequency that Laboratory Tests Influence Medical  
275 Decisions. J Appl Lab Med An AACC Publ [Internet]. 2017 Jan 1 [cited 2020 Jun  
276 11];1(4):410–4. Available from: [https://academic.oup.com/jalm/article/1/4/410-  
277 414/5587412](https://academic.oup.com/jalm/article/1/4/410-414/5587412)
- 278 5. Rohr UP, Binder C, Dieterle T, Giusti F, Messina CGM, Toerien E, Moch H,  
279 Hendrikschäfer H. The value of in vitro diagnostic testing in medical practice: A status  
280 report. PLoS One. 2016 Mar 1;11(3).
- 281 6. Nkengasong JN, Mesele T, Orloff S, Kebede Y, Fonjungo PN, Timperi R, Birx D. Critical  
282 role of developing national strategic plans as a guide to strengthen laboratory health  
283 systems in resource-poor settings. In: American Journal of Clinical Pathology. Am J Clin  
284 Pathol; 2009. p. 852–7.
- 285 7. Mazaba M, Mwaba P, Droti B, Kagulura S, Makasa C, Masaninga F, Kachimba J,  
286 Vwalika B, Mufunda J. Leveraging Existing Laboratory Capacity towards Universal  
287 Health Coverage: A Case of Zambian Laboratory Services. Med J Zambia.  
288 2016;43(2):88–93.
- 289 8. Bates I, Maitland K. Are laboratory services coming of age in sub-Saharan Africa? Clin  
290 Infect Dis [Internet]. 2006 Feb 1 [cited 2020 Jun 11];42(3):383–4. Available from:  
291 <http://www.ncbi.nlm.nih.gov/pubmed/16392085>
- 292 9. Anonychuk A, Beastall G, Shorter S, Kloss-Wolf R, Neumann P. A Framework for  
293 Assessing the Value of Laboratory Diagnostics. Healthc Manag Forum [Internet]. 2012  
294 Oct 1 [cited 2020 Jun 11];25(3\_suppl):S4–11. Available from:

- 295 <http://journals.sagepub.com/doi/10.1016/j.hcmf.2012.07.015>
- 296 10. Mephram SO, Squire SB, Chisuwo L, Kandulu J, Bates I. Utilisation of laboratory services  
297 by health workers in a district hospital in Malawi. *J Clin Pathol*. 2009 Oct;62(10):935–8.
- 298 11. Moyo K, Porter C, Chilima B, Mwenda R, Kabue M, Zungu L, Sarr A. Use of laboratory  
299 test results in patient management by clinicians in Malawi. *Afr J Lab Med*. 2015 May  
300 13;4(1).
- 301 12. Okeke IN. Diagnostic insufficiency in Africa. *Clin Infect Dis* [Internet]. 2006 May 15  
302 [cited 2020 Jun 11];42(10):1501–3. Available from:  
303 <http://www.ncbi.nlm.nih.gov/pubmed/16619170>
- 304 13. Hailu HA, Yalew A, Desale A, Asrat H, Kebede S, Dejene D, Abebe H, Gashu A, Moges  
305 B, Yemanebrhane N, Melese D, Ayele BT, Kebede A, Abate E. Physicians’ satisfaction  
306 with clinical laboratory services at public hospitals in Ethiopia: A national survey. *PLoS*  
307 *One*. 2020 Apr 1;15(4):e0232178.
- 308 14. Chanda W, Manyepa M, Chikwanda E, Daka V, Chileshe J, Tembo M, Kasongo J,  
309 Chipipa A, Handema R, Mulemena JA. Evaluation of antibiotic susceptibility patterns of  
310 pathogens isolated from routine laboratory specimens at Ndola Teaching Hospital: A  
311 retrospective study. Abuelo A, editor. *PLoS One* [Internet]. 2019 Dec 23 [cited 2020 Aug  
312 28];14(12):e0226676. Available from: <https://dx.plos.org/10.1371/journal.pone.0226676>
- 313 15. Mwale K. Intestinal Infestations in Under-Five Children in Zambia. *Int J MCH AIDS*  
314 [Internet]. 2016 Jan 1 [cited 2020 Aug 28];4(2):40–6. Available from:  
315 <https://europepmc.org/articles/PMC4948131>
- 316 16. Taber KS. The Use of Cronbach’s Alpha When Developing and Reporting Research  
317 Instruments in Science Education. *Res Sci Educ* [Internet]. 2018 Dec 1 [cited 2020 Aug  
318 22];48(6):1273–96. Available from: [https://link.springer.com/article/10.1007/s11165-016-](https://link.springer.com/article/10.1007/s11165-016-9602-2)  
319 [9602-2](https://link.springer.com/article/10.1007/s11165-016-9602-2)
- 320 17. Faber J, Fonseca LM. How sample size influences research outcomes. *Dental Press J*  
321 *Orthod* [Internet]. 2014 Jul 1 [cited 2020 Aug 28];19(4):27–9. Available from:  
322 [/pmc/articles/PMC4296634/?report=abstract](https://pubmed.ncbi.nlm.nih.gov/25411111/)
- 323 18. Carter J, Östensen H, Heuck CC. Good clinical diagnostic practice A guide for clinicians  
324 in developing countries to the clinical diagnosis of disease and to making proper use of  
325 clinical diagnostic services. 2005.

- 326 19. Polage CR, Bedu-Addo G, Owusu-Ofori A, Frimpong E, Lloyd W, Zurcher E, Hale D  
327 Von, Petti CA. Laboratory use in Ghana: Physician perception and practice. *Am J Trop*  
328 *Med Hyg.* 2006;75(3):526–31.
- 329 20. Bates I, Bekoe V, Asamoah-Adu A. Improving the accuracy of malaria-related laboratory  
330 tests in Ghana [Internet]. Vol. 3, *Malaria Journal*. *Malar J*; 2004 [cited 2020 Jul 13].  
331 Available from: <https://pubmed.ncbi.nlm.nih.gov/15516269/>
- 332 21. Lippi G, Da Rin G. Advantages and limitations of total laboratory automation: A personal  
333 overview [Internet]. Vol. 57, *Clinical Chemistry and Laboratory Medicine*. De Gruyter;  
334 2019 [cited 2020 Sep 19]. p. 802–11. Available from:  
335 <https://pubmed.ncbi.nlm.nih.gov/30710480/>
- 336 22. Hecimovich MD, Volet SE. Importance of Building Confidence in Patient  
337 Communication and Clinical Skills Among Chiropractic Students. *J Chiropr Educ*  
338 [Internet]. 2009 Oct 1 [cited 2020 Aug 26];23(2):151–64. Available from:  
339 [/pmc/articles/PMC2759993/?report=abstract](https://pubmed.ncbi.nlm.nih.gov/19111111/)
- 340 23. Petti CA, Polage CR, Quinn TC, Ronald AR, Sande MA. Laboratory Medicine in Africa:  
341 A Barrier to Effective Health Care. *Clin Infect Dis.* 2006 Feb 1;42(3):377–82.
- 342 24. Petrose LG, Fisher AM, Douglas GP, Terry MA, Muula A, Chawani MS, Limula H,  
343 Driessen J. Assessing perceived challenges to laboratory testing at a malawian referral  
344 hospital. *Am J Trop Med Hyg.* 2016 Jun 1;94(6):1426–32.
- 345
